# Supplementary figures and images for: Potassium ions promote electrochemical nitrogen reduction on nano-Au catalysts triggered by bifunctional boron supramolecular assembly
Source: Royal Society of Chemistry journal article supplement (doi:10.1039/d0ta04580b), 2020-01-01

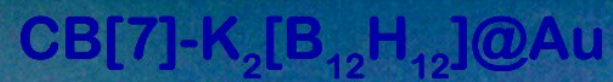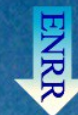

Ammonia yield:

41.69  $\mu\text{g h}^{-1} \text{mg}_{\text{cat.}}^{-1}$   
or  
33.36  $\mu\text{g h}^{-1} \text{cm}^{-2}$

FE: 29.53%

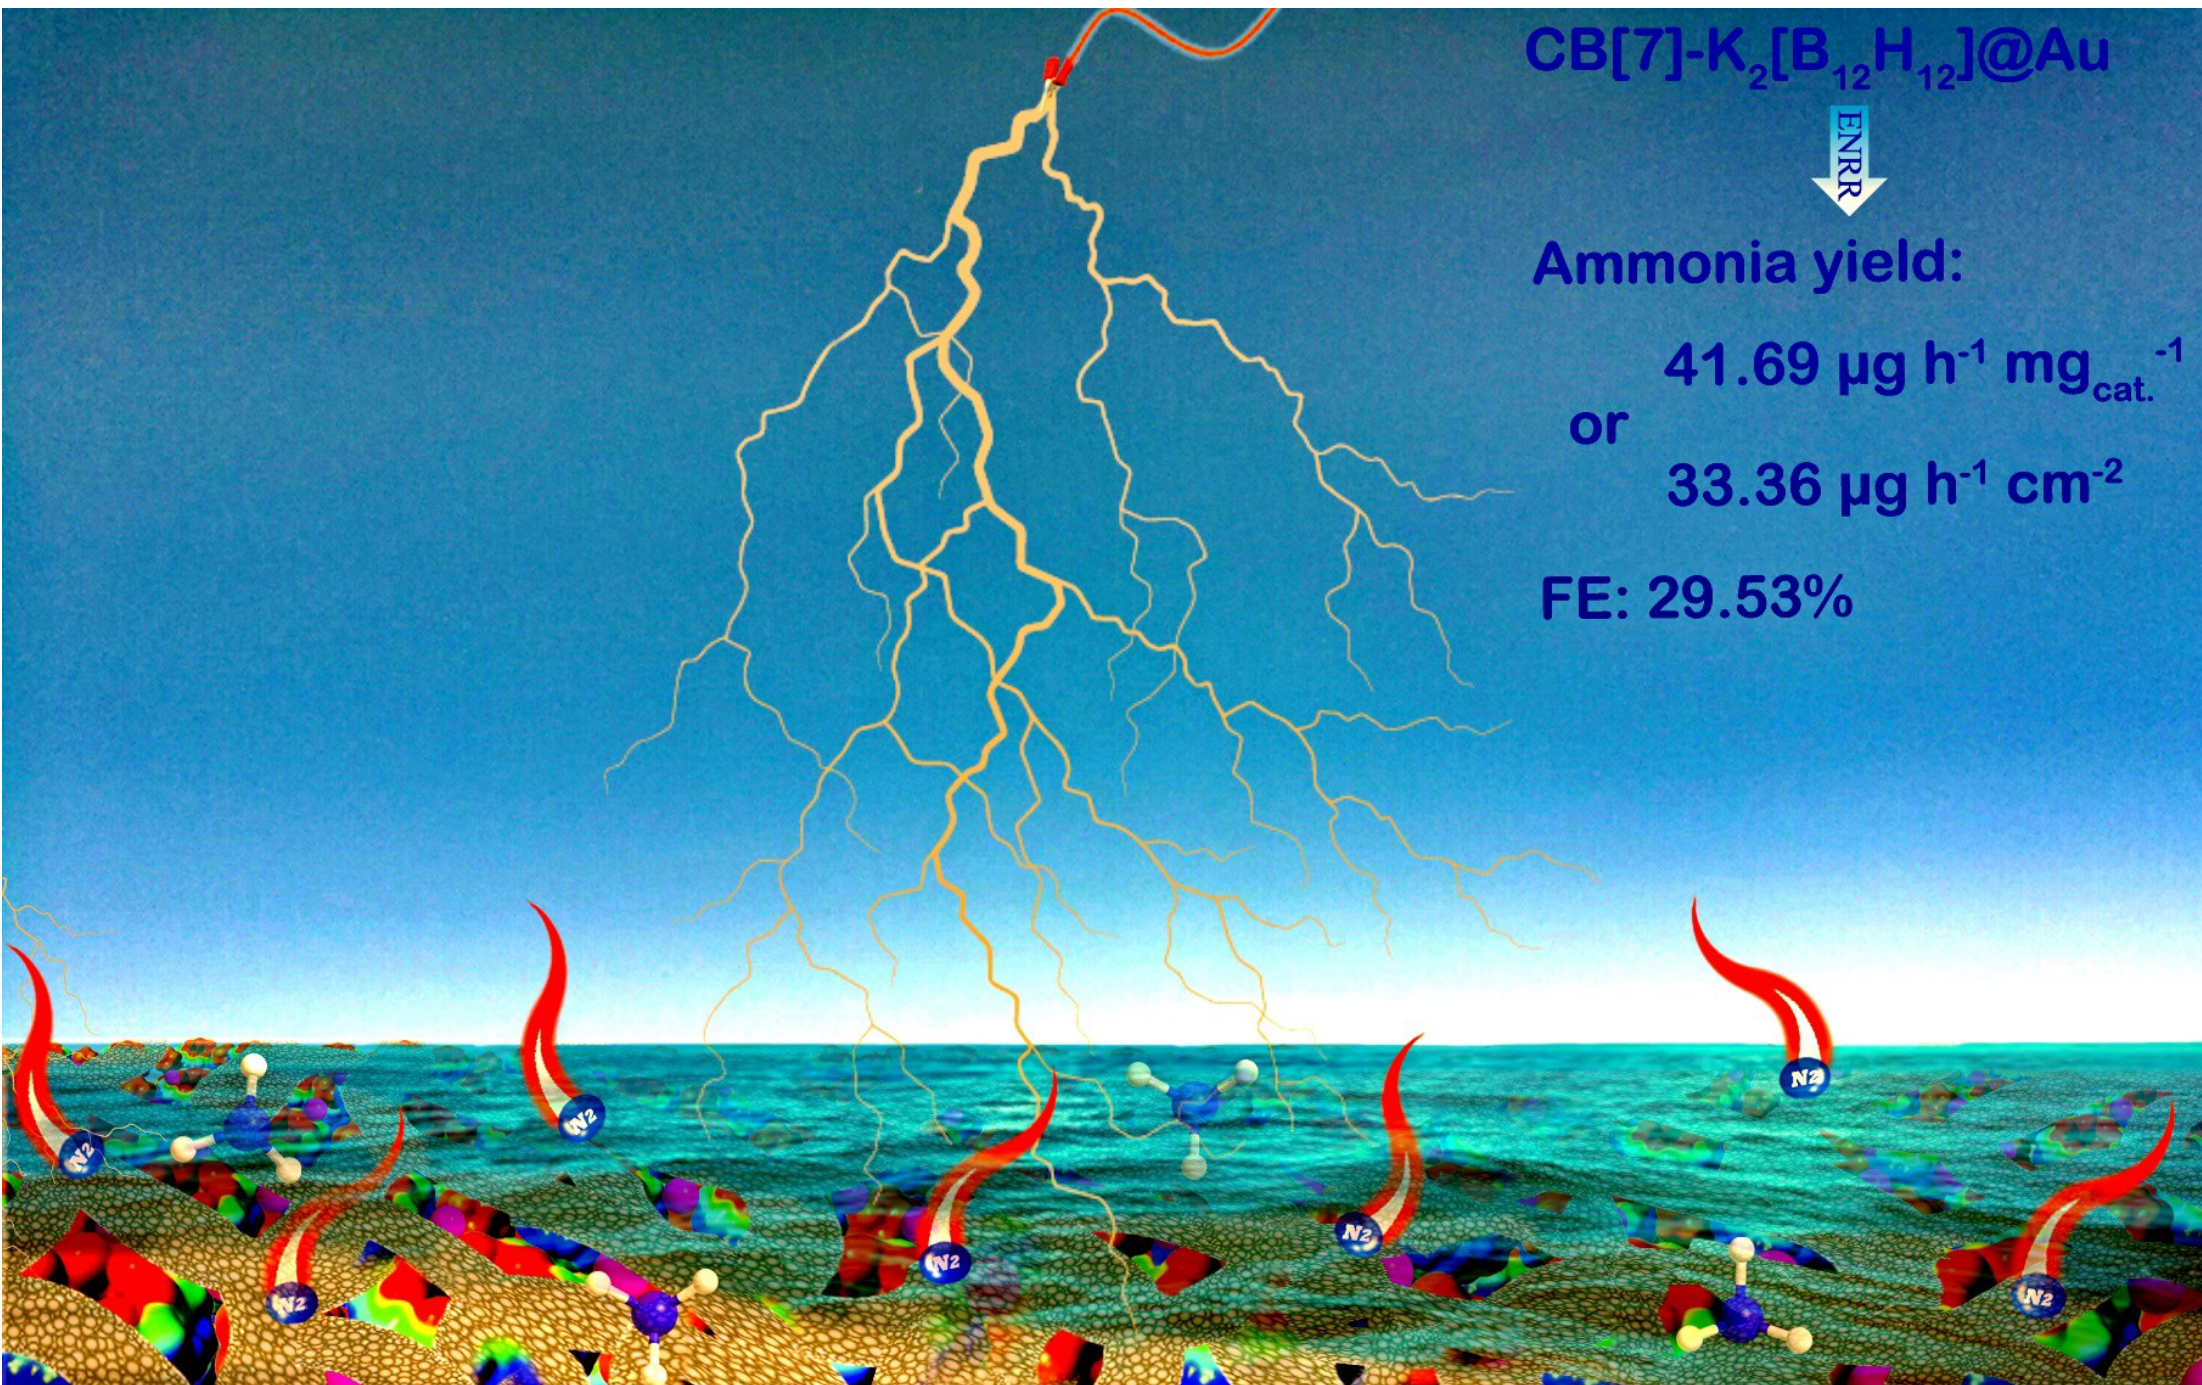

Supplement: d0ta04580b2.pdf [file d0ta04580b2.pdf]
